# Supplementary material for: Effectiveness of Postoperative or Preoperative Radiotherapy on Prognosis in Patients with Stage II Resectable Non-Small Cell Lung Cancer: A Retrospective Study Based on the SEER Database
Source: MDPI journal article supplement (doi:10.3390/medicina57111202), 2021-11-04
Supplement: s1 [file s1]

Table S1 Univariate analysis of variables influencing prognosis of patients

| Variables         | N0    |                |         | N1    |                |         | Overall |                |         |
|-------------------|-------|----------------|---------|-------|----------------|---------|---------|----------------|---------|
|                   | HR    | 95% CI         | P Value | HR    | 95% CI         | P Value | HR      | 95% CI         | P Value |
| Total, n          |       | 2177           |         |       | 1463           |         |         | 3640           |         |
| Treatment         |       |                |         |       |                |         |         |                |         |
| Non-PRRT/PORT     |       | Ref            |         |       | Ref            |         |         | Ref            |         |
| PORT              | 1.600 | (1.290, 1.980) | <.001   | 1.720 | (1.322, 2.250) | <.001   | 1.620   | (1.370, 1.920) | <.001   |
| PRRT              | 1.620 | (1.120, 2.340) | .010    | 1.180 | (0.566, 2.440) | .660    | 1.480   | (1.060, 2.050) | .020    |
| Year of diagnosis |       |                |         |       |                |         |         |                |         |
| 2010              |       | Ref            |         |       | Ref            |         |         | Ref            |         |
| 2011              | 0.837 | (0.665, 1.052) | .130    | 0.973 | (0.763, 1.242) | .830    | 0.894   | (0.756, 1.057) | .190    |
| 2012              | 0.914 | (0.724, 1.154) | .450    | 0.968 | (0.739, 1.268) | .810    | 0.930   | (0.78, 1.109)  | .420    |
| 2013              | 1.019 | (0.809, 1.283) | .870    | 0.725 | (0.544, 0.967) | .029    | 0.892   | (0.746, 1.067) | .210    |
| 2014              | 0.658 | (0.501, 0.865) | .003    | 0.703 | (0.517, 0.954) | .024    | 0.675   | (0.551, 0.828) | <.001   |
| 2015              | 0.575 | (0.417, 0.793) | .001    | 0.566 | (0.394, 0.815) | .002    | 0.571   | (0.449, 0.726) | <.001   |
| Age at diagnosis  | 1.020 | (1.010, 1.020) | <.001   | 1.010 | (1.005, 1.024) | .072    | 1.015   | (1.009, 1.021) | <.001   |
| Sex               |       |                |         |       |                |         |         |                |         |
| Female            |       | Ref            |         |       | Ref            |         |         | Ref            |         |
| Male              | 1.370 | (1.180, 1.590) | <.001   | 1.240 | (1.040, 1.470) | .016    | 1.311   | (1.171, 1.468) | <.001   |
| Race              |       |                |         |       |                |         |         |                |         |
| Black             |       | Ref            |         |       | Ref            |         |         | Ref            |         |
| White             | 0.969 | (0.754, 1.240) | .800    | 0.827 | (0.633, 1.079) | .160    | 0.897   | (0.730, 1.221) | .240    |
| Others            | 1.299 | (0.924, 1.830) | .130    | 0.632 | (0.426, 0.937) | .022    | 0.944   | (0.748, 1.077) | .660    |
| Pathologic Grade  |       |                |         |       |                |         |         |                |         |
| I                 |       | Ref            |         |       | Ref            |         |         | Ref            |         |
| II                | 1.140 | (0.899, 1.450) | .280    | 1.190 | (0.805, 1.805) | .390    | 1.180   | (0.963, 1.446) | .110    |
| III               | 1.430 | (1.124, 1.810) | .004    | 1.630 | (1.075, 2.416) | .016    | 1.535   | (1.254, 1.878) | <.001   |

|                      |       |                   |       |       |                   |       |       |                   |       |
|----------------------|-------|-------------------|-------|-------|-------------------|-------|-------|-------------------|-------|
| IV                   | 2.020 | (1.245,<br>3.270) | .004  | 1.820 | (0.862,<br>3.448) | .094  | 1.965 | (1.325,<br>2.915) | <.001 |
| Unknown              | 1.430 | (1.022,<br>1.990) | .037  | 1.000 | (0.503,<br>1.689) | .990  | 1.303 | (0.972,<br>1.747) | .076  |
| Tumor Size           | 1.004 | (1.002,<br>1.005) | <.001 | 1.007 | (1.003,<br>1.014) | .003  | 1.003 | (1.002,<br>1.004) | <.001 |
| Location             |       |                   |       |       |                   |       |       |                   |       |
| Upper lobe           |       | Ref               |       |       | Ref               |       |       | Ref               |       |
| Middle lobe          | 1.140 | (0.753,<br>1.720) | .540  | 0.991 | (0.710,<br>1.380) | .960  | 1.090 | (0.842,<br>1.411) | .510  |
| Lower lobe           | 1.260 | (1.076,<br>1.470) | .004  | 1.093 | (0.907,<br>1.320) | .350  | 1.191 | (1.056,<br>1.343) | .004  |
| Main<br>bronchus     | 2.170 | (1.055,<br>4.480) | .035  | 0.818 | (0.338,<br>1.980) | .660  | 1.372 | (0.788,<br>2.389) | .260  |
| Others               | 1.770 | (1.203,<br>2.590) | .004  | 1.897 | (1.137,<br>3.160) | .014  | 1.786 | (1.314,<br>2.428) | <.001 |
| Histology            |       |                   |       |       |                   |       |       |                   |       |
| Ad                   |       | Ref               |       |       | Ref               |       |       |                   | Ref   |
| Sq                   | 1.180 | (1.010,<br>1.390) | .041  | 1.010 | (0.678,<br>1.500) | .960  | 1.055 | (0.932,<br>0.195) | .390  |
| Others               | 1.620 | (1.190,<br>2.190) | .002  | 0.897 | (0.738,<br>1.090) | .270  | 1.340 | (1.053,<br>1.705) | .017  |
| Stage                |       |                   |       |       |                   |       |       |                   |       |
| IIA                  |       | Ref               |       |       | Ref               |       |       | Ref               |       |
| IIB                  | 1.110 | (0.938,<br>1.307) | .230  | 1.230 | (0.969,<br>1.560) | .089  | 1.028 | (0.919,<br>1.150) | .630  |
| T                    |       |                   |       |       |                   |       |       |                   |       |
| T1                   |       | Ref               |       |       | Ref               |       |       | Ref               |       |
| T2                   | —     | —                 | —     | 1.340 | (1.120,<br>1.610) | .002  | 1.197 | (1.006,<br>1.423) | .042  |
| T3                   | 1.107 | (0.938,<br>1.307) | .230  | —     | —                 | —     | 1.104 | (0.926,<br>1.315) | .270  |
| POCT                 |       |                   |       |       |                   |       |       |                   |       |
| No                   |       | Ref               |       |       | Ref               |       |       | Ref               |       |
| Yes                  | 0.932 | (0.800,<br>1.090) | .370  | 0.699 | (0.587,<br>0.832) | <.001 | 0.861 | (0.769,<br>0.963) | .009  |
| Positive Lymph Nodes |       |                   |       |       |                   |       |       |                   |       |
| <3                   |       | Ref               |       |       | Ref               |       |       | Ref               |       |
| ≥3                   | 1.670 | (1.270,<br>2.210) | <.001 | 1.420 | (1.170,<br>1.710) | <.001 | 1.520 | (1.309,<br>1.765) | <.001 |

Note: POCT = postoperative chemotherapy; PORT = postoperative radiotherapy; PRRT= preoperative radiotherapy; Non-PORT/PRRT = neither PORT nor PRRT. In classification of histology, Ad = adenocarcinoma, Sq = squamous cell carcinoma.

Table S2 Multivariate analysis of variables influencing prognosis of patients

| Variables         | N0    |                |         | N1    |                |         | Overall |                |         |
|-------------------|-------|----------------|---------|-------|----------------|---------|---------|----------------|---------|
|                   | HR    | 95% CI         | P Value | HR    | 95% CI         | P Value | HR      | 95% CI         | P Value |
| Total, n          |       | 2177           |         |       | 1463           |         |         | 3640           |         |
| Treatment         |       |                |         |       |                |         |         |                |         |
| Non-PRRT/PORT     |       | Ref            |         |       | Ref            |         |         | Ref            |         |
| PORT              | 1.648 | (1.309, 2.075) | <.001   | 1.721 | (1.276, 2.320) | <.001   | 1.662   | (1.388, 1.989) | <.001   |
| PRRT              | 1.790 | (1.201, 2.668) | .004    | 1.340 | (0.630, 2.851) | .450    | 1.694   | (1.197, 2.398) | .003    |
| Year of diagnosis |       |                |         |       |                |         |         |                |         |
| 2010              |       | Ref            |         |       | Ref            |         |         | Ref            |         |
| 2011              | 0.875 | (0.691, 1.107) | .270    | 0.967 | (0.749, 1.249) | .800    | 0.908   | (0.764, 1.078) | .270    |
| 2012              | 0.884 | (0.693, 1.129) | .320    | 1.031 | (0.781, 1.360) | .830    | 0.940   | (0.785, 1.126) | .500    |
| 2013              | 1.045 | (0.824, 1.326) | .720    | 0.742 | (0.553, 0.997) | .048    | 0.908   | (0.756, 1.091) | .300    |
| 2014              | 0.684 | (0.517, 0.905) | .008    | 0.734 | (0.539, 1.000) | .050    | 0.692   | (0.563, 0.850) | <.001   |
| 2015              | 0.633 | (0.457, 0.877) | .006    | 0.600 | (0.413, 0.872) | .007    | 0.611   | (0.478, 0.780) | <.001   |
| Age at diagnosis  | 1.017 | (1.008, 1.026) | <.001   | 1.009 | (0.999, 1.019) | .072    | 1.014   | (1.008, 1.021) | <.001   |
| Sex               |       |                |         |       |                |         |         |                |         |
| Female            |       | Ref            |         |       | Ref            |         |         | Ref            |         |
| Male              | 1.278 | (1.089, 1.500) | .003    | 1.258 | (1.052, 1.504) | .012    | 1.263   | (1.122, 1.421) | <.001   |
| Race              |       |                |         |       |                |         |         |                |         |
| Black             |       | Ref            |         |       | Ref            |         |         | Ref            |         |
| White             | 0.951 | (0.737, 1.226) | .700    | 0.758 | (0.574, 1.002) | .052    | 0.855   | (0.710, 1.029) | .098    |
| Others            | 1.247 | (0.877, 1.773) | .220    | 0.534 | (0.356, 0.802) | .003    | 0.844   | (0.646, 1.102) | .210    |
| Pathologic Grade  |       |                |         |       |                |         |         |                |         |
| I                 |       | Ref            |         |       | Ref            |         |         | Ref            |         |
| II                | 1.187 | (0.927, 1.520) | .170    | 1.205 | (0.805, 1.805) | .370    | 1.236   | (1.004, 1.522) | .046    |
| III               | 1.423 | (1.099, 1.843) | .007    | 1.612 | (1.075, 2.416) | .021    | 1.561   | (1.262, 1.930) | <.001   |

|                      |       |                   |       |       |                   |       |       |                   |       |
|----------------------|-------|-------------------|-------|-------|-------------------|-------|-------|-------------------|-------|
| IV                   | 2.017 | (1.192,<br>3.412) | .009  | 1.724 | (0.862,<br>3.448) | .120  | 2.067 | (1.375,<br>3.108) | <.001 |
| Unknown              | 1.249 | (0.878,<br>1.778) | .220  | 0.921 | (0.503,<br>1.689) | .790  | 1.201 | (0.889,<br>1.622) | .230  |
| Tumor Size           | 1.003 | (1.002,<br>1.004) | <.001 | 1.007 | (0.996,<br>1.018) | .230  | 1.003 | (1.002,<br>1.004) | <.001 |
| Location             |       |                   |       |       |                   |       |       |                   |       |
| Upper lobe           |       | Ref               |       |       | Ref               |       |       | Ref               |       |
| Middle lobe          | 1.184 | (0.778,<br>1.807) | .430  | 1.061 | (0.759,<br>1.482) | .730  | 1.163 | (0.895,<br>1.510) | .260  |
| Lower lobe           | 1.287 | (1.090,<br>1.519) | .003  | 1.106 | (0.916,<br>1.337) | .300  | 1.213 | (1.071,<br>1.373) | .002  |
| Main<br>bronchus     | 1.740 | (0.764,<br>3.966) | .190  | 0.897 | (0.351,<br>2.296) | .820  | 1.347 | (0.743,<br>2.442) | .330  |
| Others               | 1.699 | (1.145,<br>2.520) | .009  | 1.828 | (1.077,<br>3.101) | .025  | 1.700 | (1.241,<br>2.328) | .001  |
| Histology            |       |                   |       |       |                   |       |       |                   |       |
| Ad                   |       | Ref               |       |       | Ref               |       |       |                   | Ref   |
| Sq                   | 0.959 | (0.800,<br>1.149) | .650  | 0.732 | (0.593,<br>0.903) | .004  | 0.856 | (0.748,<br>0.979) | .024  |
| Others               | 1.226 | (0.878,<br>1.711) | .230  | 0.870 | (0.579,<br>1.308) | .500  | 1.063 | (0.825,<br>1.369) | .640  |
| Stage                |       |                   |       |       |                   |       |       |                   |       |
| IIA                  |       | Ref               |       |       | Ref               |       |       | Ref               |       |
| IIB                  | 1.134 | (0.953,<br>1.350) | .160  | 0.856 | (0.591,<br>1.240) | .410  | 1.079 | (0.844,<br>1.380) | .540  |
| T                    |       |                   |       |       |                   |       |       |                   |       |
| T1                   |       | —                 |       |       | Ref               |       |       | Ref               |       |
| T2                   | —     | —                 | —     | 1.179 | (0.921,<br>1.508) | .190  | 1.028 | (0.856,<br>1.234) | .770  |
| T3                   | —     | —                 | —     | —     | —                 | —     | 0.904 | (0.661,<br>1.236) | .530  |
| POCT                 |       |                   |       |       |                   |       |       |                   |       |
| No                   |       | Ref               |       |       | Ref               |       |       | Ref               |       |
| Yes                  | 0.847 | (0.713,<br>1.005) | .057  | 0.663 | (0.548,<br>0.802) | <.001 | 0.799 | (0.705,<br>0.907) | <.001 |
| Positive Lymph Nodes |       |                   |       |       |                   |       |       |                   |       |
| <3                   |       | Ref               |       |       | Ref               |       |       | Ref               |       |
| ≥3                   | 1.674 | (1.243,<br>2.255) | <.001 | 1.368 | (1.115,<br>1.679) | .003  | 1.538 | (1.310,<br>1.806) | <.001 |

Note: POCT = postoperative chemotherapy; PORT = postoperative radiotherapy; PRRT= preoperative radiotherapy; Non-PORT/PRRT = neither PORT nor PRRT. In classification of histology, Ad = adenocarcinoma, Sq = squamous cell carcinoma.
